# Supplementary material for: CD85k Contributes to Regulatory T Cell Function in Chronic Viral Infections
Source: Int J Mol Sci. 2020 Dec 22;22(1):31. doi: 10.3390/ijms22010031 (PMC7792974; doi:10.3390/ijms22010031)

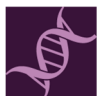

*Supplementary Material*

# CD85k contributes to regulatory T cell function in chronic viral infections

**Anna Estrada Brull <sup>1,†</sup>, Felix Rost <sup>1,†</sup>, Josua Oderbolz <sup>2</sup>, Florian R. Kirchner <sup>1,3</sup>,  
Salomé Leibundgut-Landmann <sup>1,3</sup>, Annette Oxenius <sup>2</sup> and Nicole Joller <sup>1,\*</sup>**

<sup>1</sup> University of Zurich, Institute of Experimental Immunology, 8057 Zurich, Switzerland; anna.estrada-brull@uzh.ch (A.E.B.); rost@immunology.uzh.ch (F.R.); florian.kirchner@uzh.ch (F.R.K.); salome.leibundgut-landmann@uzh.ch (S.L.-L.)

<sup>2</sup> ETH Zurich, Institute of Microbiology, 8093 Zurich, Switzerland; josua.oderbolz@micro.biol.ethz.ch (J.O.); aoxenius@micro.biol.ethz.ch (A.O.)

<sup>3</sup> University of Zurich, Section of Immunology, Vetsuisse Faculty, 8057 Zurich, Switzerland

\* Correspondence: nicole.joller@uzh.ch

† These authors contributed equally.

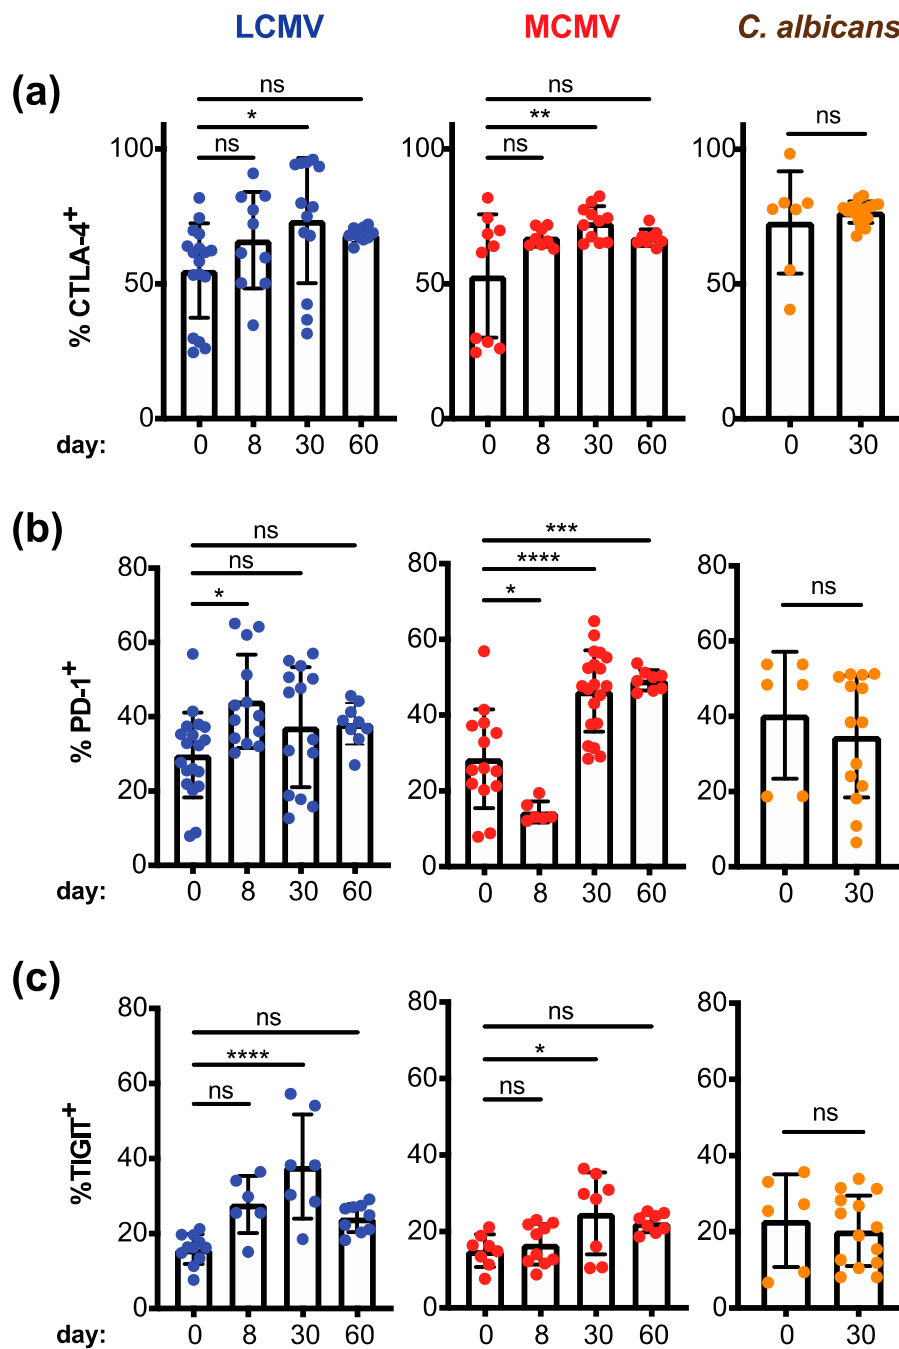

**Figure S1.** Treg characterization during chronic infection. C57BL/6 mice were infected with LCMV Clone 13 (blue,  $2 \times 10^6$  ffu i.v.), MCMV (red,  $2 \times 10^5$  ffu i.v.), or *C. albicans* strain 101 (orange,  $2.5 \times 10^6$  cfu sublingual), sacrificed 8, 30, and 60 days post infection. Spleens (LCMV, MCMV) or cervical lymph nodes (*C. albicans*) were harvested and directly analyzed *ex vivo* by flow cytometry. Summary graphs for frequencies of CTLA-4<sup>+</sup> (a), PD-1<sup>+</sup> (b), and TIGIT<sup>+</sup> (c) Tregs are depicted (Mean  $\pm$  SEM; biological replicates: LCMV / MCMV / *C. albicans*: Naive n = 9-14 / 9-15 / 7; day 8 n = 8-13 / 4-10; day 30 n = 7-13 / 5-20 / 19, analyzed in 6 / 2-4 / 2-4 independent experiments). \*p < 0.05, \*\*p < 0.01, \*\*\*p < 0.001, \*\*\*\*p < 0.0001; for comparison of two, three or six groups 2-sided t-Test, one-way ANOVA, or two-way ANOVA with multiple comparisons were used, respectively.

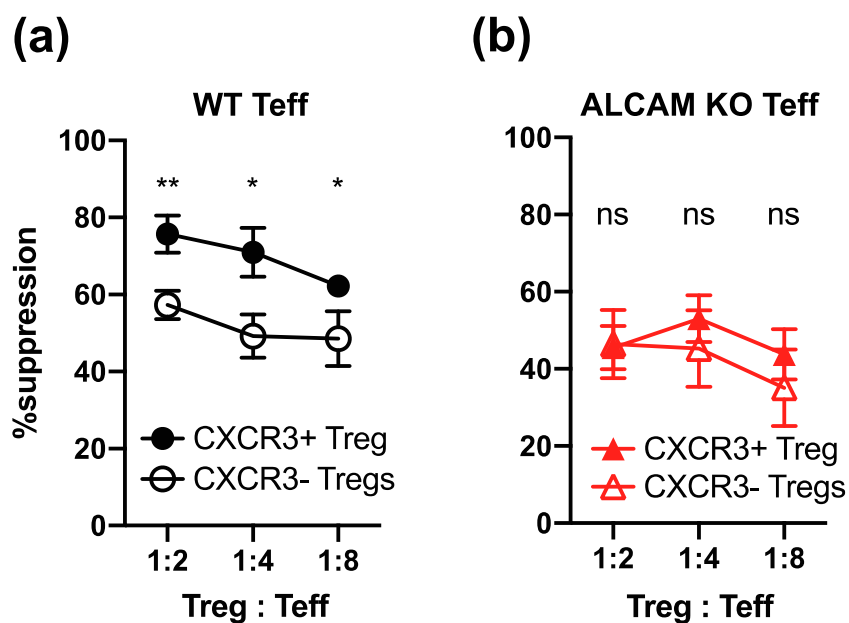

**Figure S2.** Suppression by type 1 Tregs is ALCAM-dependent. CXCR3<sup>+</sup>CD4<sup>+</sup>GFP<sup>+</sup> and CXCR3<sup>−</sup>CD4<sup>+</sup>GFP<sup>+</sup> Tregs were sorted from LCMV Clone 13 infected Foxp3-GFP reporter mice (day 25) and co-cultured with CD4<sup>+</sup> Th1 effector cells sorted from C57BL/6 WT mice (a) or ALCAM<sup>−/−</sup> mice (b) also infected with LCMV Clone 13 (day 10). Cells were stimulated with anti-CD3 and irradiated splenic APCs for 2 days before proliferation was determined by [<sup>3</sup>H]-thymidine incorporation and Treg-mediated suppression was calculated (mean ± SD; n = 3; 1 representative experiment of 2 is shown). \*p < 0.05, \*\*p < 0.01; t-Test.

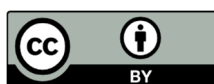

Supplement: Supplementary file 1 [file ijms-22-00031-s001.pdf]
